# Supplementary material for: Kiwifruit Metabolomics—An Investigation of within Orchard Metabolite Variability of Two Cultivars of Actinidia chinensis
Source: MDPI journal article supplement (doi:10.3390/metabo11090603), 2021-09-06
Supplement: s1 [file s1]

## Supplementary Materials

Table S1. Metabolite variability in QC composite samples

Table S2. Median concentrations (mg/g), %CV and %CV due inter-vine variation of soluble carbohydrates measured in internode, leaf and fruit of Hayward kiwifruit at three harvest times.

Table S3. Table S3. Median concentrations (mg/g), %CV and %CV due inter-vine variation of soluble carbohydrates measured in internode, leaf and fruit of Zesy002 kiwifruit at three harvest times.

Table S4. Median concentrations (ng/g), %CV and %CV due inter-vine variation of selected phytohormones measured in internode, leaf and fruit of Hayward and Zesy002 kiwifruit at three harvest times.

Figure S1. Principal Components Analysis of Psa, sampler and individual vine effects on metabolite profiles in internode, leaf and fruit tissues of 'Hayward' kiwifruit collected at three harvest times. Data are for metabolites with CV <20% in the experimental data.

Figure S2. Principal Components Analysis of Psa, sampler and individual vine effects on metabolite profiles in internode, leaf and fruit tissues of Zesy002 kiwifruit collected at three harvest times. Data are for metabolites with CV <20% in the experimental data.

Datafiles:

Hayward metabolomics data: 'HaywardmetabolomicsdataallANOVA.xlsx'.

Zesy002 metabolomics data: 'Zesy002metabolomicdataallANNOVA.xlsx'.

**Table S1.** Metabolites (mass tags) measured and percent with CV<20% (bracketed) in composite QC samples (typically n = 6) of 'Hayward' and Zesy002 kiwifruit vines.

| Cultivar  |           | 'Hayward'   |                  | Zesy002   |             |                  |
|-----------|-----------|-------------|------------------|-----------|-------------|------------------|
| Tissue    | Internode | Mature leaf | Young leaf/fruit | Internode | Mature leaf | Young leaf/fruit |
| Harvest 1 | 392 (91)  | 458 (92)    | 503 (94)         | 276 (92)* | 276 (92)*   | 276 (92)*        |
| Harvest 2 | 376 (91)  | 450 (94)    | 365 (90)         | 362 (99)* | 362 (99)*   | 362 (99)*        |
| Harvest 3 | 615 (92)  | 606 (94)    | 448 (85)         | 521 (90)  | 629(95)     | 375 (83)         |

\* Composite sample prepared from internode, and mature and young leaf Gold3 tissue samples.

**Table S2.** Median concentrations (mg/g), %CV and %CV due inter-vine variation of soluble carbohydrates measured in internode, leaf and fruit of Hayward kiwifruit at three harvest times. Concentrations are mg/g fresh weight (FW) or mg/g dry weight (DW).

| Hayward<br>kiwifruit |                                | Harvest 1 |             |            | Harvest 2 |             |       | Harvest 3 |             |       | Mean | Range    |
|----------------------|--------------------------------|-----------|-------------|------------|-----------|-------------|-------|-----------|-------------|-------|------|----------|
|                      |                                | Internode | Mature leaf | Young leaf | Internode | Mature leaf | Fruit | Internode | Mature leaf | Fruit |      |          |
|                      |                                | DW        | DW          | DW         | DW        | DW          | FW    | DW        | DW          | FW    |      |          |
| <i>myo</i> -Inositol | median concentration           | 7.4       | 8.2         | 8.1        | 2.1       | 8.5         | 0.9   | 4.4       | 12.1        | 1.5   |      |          |
|                      | %CV of samples                 | 22        | 25          | 35         | 18        | 26          | 11    | 27        | 19          | 12    | 21.7 | 11 - 35  |
|                      | %CV due inter-vine variability | 0         | 66          | 9          | 31        | 29          | 16    | 51        | 0           | 59    | 29.0 | 0 - 66   |
| Galactinol           | median concentration           | 1.7       | 2.3         | 2.1        | 0.8       | 2           | 0.1   | 1         | 2.4         | 0.1   |      |          |
|                      | %CV of samples                 | 17        | 29          | 40         | 20        | 25          | 32    | 26        | 21          | 20    | 25.6 | 17 - 40  |
|                      | %CV due inter-vine variability | 17        | 10          | 43         | 8         | 0           | 7     | 20        | 4           | 34    | 15.9 | 0 - 43   |
| Glucose              | median concentration           | 20.6      | 20.5        | 11.9       | 0.7       | 2           | 2.8   | 0.2       | 2           | 2     |      |          |
|                      | %CV of samples                 | 28        | 35          | 47         | 84        | 70          | 24    | 148       | 47          | 36    | 57.7 | 24 - 148 |
|                      | %CV due inter-vine variability | 0         | 46          | 0          | 17        | 1           | 70    | 1         | 37          | 28    | 22.2 | 0 - 70   |
| Fructose             | median concentration           | 3.4       | 7.5         | 4          | 0.7       | 3.1         | 0.9   | 0.3       | 2.7         | 0.5   |      |          |
|                      | %CV of samples                 | 40        | 35          | 42         | 73        | 57          | 18    | 152       | 58          | 33    | 56.4 | 18 - 152 |
|                      | %CV due inter-vine variability | 33        | 44          | 55         | 19        | 0           | 35    | 5         | 70          | 49    | 34.4 | 0 - 70   |
| Sucrose              | median concentration           | 27.4      | 35.3        | 29.2       | 14.1      | 33.7        | 1     | 19.8      | 44.2        | 0.8   |      |          |
|                      | %CV of samples                 | 14        | 13          | 24         | 14        | 19          | 26    | 20        | 17          | 17    | 18.2 | 13 - 26  |
|                      | %CV due inter-vine variability | 5         | 0           | 41         | 15        | 0           | 27    | 9         | 0           | 25    | 13.6 | 0 - 41   |
| Planteose            | median concentration           | 1.1       | 1.2         | 2          | 1.9       | 12.7        | 0.1   | 4         | 10.3        | 0.1   |      |          |
|                      | %CV of samples                 | 22        | 30          | 27         | 25        | 25          | 34    | 27        | 33          | 59    | 31.3 | 22 - 59  |
|                      | %CV due inter-vine variability | 31        | 15          | 2          | 69        | 0           | 39    | 9         | 0           | 17    | 20.2 | 0 - 69   |

**Table S3.** Median concentrations (mg/g), %CV and %CV due inter-vine variation of soluble carbohydrates measured in internode, leaf and fruit of Zesy002 kiwifruit at three harvest times. Concentrations are mg/g fresh weight (FW) or mg/g dry weight (DW). 'nd' below LOD taken as 5 X S/N

| Gold3 Kiwifruit      |                                | Harvest 1 |             |            | Harvest 2 |             |       | Harvest 3 |             |       | Mean | Range   |
|----------------------|--------------------------------|-----------|-------------|------------|-----------|-------------|-------|-----------|-------------|-------|------|---------|
|                      |                                | internode | mature leaf | young leaf | internode | mature leaf | fruit | internode | mature leaf | fruit |      |         |
|                      |                                | DW        | DW          | DW         | DW        | DW          | FW    | DW        | DW          | FW    |      |         |
| <i>myo</i> -Inositol | median concentration           | 4.6       | 8.8         | 8.5        | 3.2       | 8.7         | 1.5   | 2.5       | 7.1         | 1.1   |      |         |
|                      | %CV of samples                 | 44        | 17          | 15         | 26        | 15          | 35    | 19        | 19          | 14    | 22.7 | 14 - 44 |
|                      | %CV due inter-vine variability | 71        | 35          | 43         | 24        | 52          | 88    | 0         | 59          | 96    | 52.0 | 0 - 96  |
| Galactinol           | median concentration           | 1         | 1.5         | 1.7        | 0.5       | 2.5         | 0     | 0.6       | 2.5         | 0.1   |      |         |
|                      | %CV of samples                 | 30        | 34          | 21         | 23        | 38          | 36    | 24        | 33          | 15    | 28.2 | 15 - 38 |
|                      | %CV due inter-vine variability | 67        | 65          | 0          | 41        | 80          | 14    | 0         | 13          | 39    | 35.4 | 0 - 80  |
| Glucose              | median concentration           | 9         | 19          | 9.9        | 0.3       | 5.7         | 6.6   | 0.3       | 3.2         | 2.7   |      |         |
|                      | %CV of samples                 | 75        | 33          | 21         | 87        | 70          | 9     | 71        | 32          | 25    | 47.0 | 9 - 87  |
|                      | %CV due inter-vine variability | 19        | 3           | 28         | 58        | 0           | 0     | 51        | 38          | 54    | 27.9 | 0 - 56  |
| Fructose             | median concentration           | 5.6       | 21.9        | 3.5        | 0.5       | 9.5         | 2.9   | 0.5       | 3.8         | 2.4   |      |         |
|                      | %CV of samples                 | 70        | 37          | 45         | 86        | 62          | 29    | 70        | 45          | 24    | 52.0 | 24 - 86 |
|                      | %CV due inter-vine variability | 4         | 67          | 19         | 72        | 0           | 62    | 0         | 30          | 54    | 34.2 | 0 - 72  |
| Sucrose              | median concentration           | 56.9      | 63.7        | 19.1       | 20.5      | 37.2        | 0.8   | 11.9      | 27          | 1     |      |         |
|                      | %CV of samples                 | 15        | 26          | 15         | 18        | 21          | 74    | 13        | 20          | 12    | 23.8 | 12 - 74 |
|                      | %CV due inter-vine variability | 44        | 72          | 0          | 45        | 53          | 91    | 0         | 34          | 65    | 44.9 | 0 - 91  |
| Planteose            | median concentration           | nd        | 9           | 0.7        | 2.7       | 16.8        | nd    | 4.3       | 10.2        | 0.1   |      |         |
|                      | %CV of samples                 |           | 53          | 93         | 32        | 38          |       | 25        | 43          | 18    | 43.1 | 18 - 93 |
|                      | %CV due inter-vine variability |           | 6           | 0          | 60        | 4           |       | 39        | 0           | 0     | 15.6 | 0 - 60  |

**Table S4.** Median concentrations (ng/g), analytical %CV calculated from technical replicates and %CV due inter-vine variation of selected phytohormones measured in internode, leaf and fruit of Hayward and Zesy002 kiwifruit at three harvest times. Concentrations are expressed as either ng/g fresh weight (FW) or ng/g dry weight (DW). ‘nd’ samples are below LOD taken as 5 X S/N. GA1, GA4 gibberellins 1 and 4, 2iP N6-isopentyladenine, 2iPR N6-isopentyladenosine, tZ *trans*-zeatin, tZR *trans*-zeatin riboside, SA salicylic acid, ABA abscisic acid, JA jasmonic acid. Quantitation against deuterated internal standards using targeted LC-MS/MS.

[illegible]

|            |                                 |             |             |            |            |             |             |            |             |            |
|------------|---------------------------------|-------------|-------------|------------|------------|-------------|-------------|------------|-------------|------------|
| <b>tZ</b>  | <b>median concentration</b>     | <b>1.6</b>  | <b>2.6</b>  | <b>nd</b>  | <b>nd</b>  | <b>2.7</b>  | <b>3.0</b>  | <b>0.1</b> | <b>1.1</b>  | <b>0.3</b> |
|            | analytical CV (%)               | 3.6         | 7.1         | -          | -          | 14.3        | 4.30        | 8.37       | -           | 15.1       |
|            | %CV samples                     | 24          | 104         | -          | -          | 97          | 48          | 131        | 36          | 38         |
|            | % CV due inter-vine variability | 48          | 41          | -          | -          | 69          | 84          | 14         | 63          | 63         |
| <b>tZR</b> | <b>median concentration</b>     | <b>8.4</b>  | <b>40</b>   | <b>1.3</b> | <b>nd</b>  | <b>12.1</b> | <b>28.0</b> | <b>1.8</b> | <b>20.0</b> | <b>6.3</b> |
|            | analytical CV (%)               | 1.7         | 4.7         | 6.7        | -          | 2.3         | 1.8         | 6.3        | 5.0         | 7.0        |
|            | %CV samples                     | 27          | 54          | 35         | -          | 24          | 44          | 51         | 58          | 46         |
|            | % CV due inter-vine variability | 58          | 0           | 72         | 0          | 32          | 42          | 26         | 25          | 77         |
| <b>SA</b>  | <b>median concentration</b>     | <b>2750</b> | <b>1255</b> | <b>117</b> | <b>38</b>  | <b>710</b>  | <b>240</b>  | <b>18</b>  | <b>80</b>   | <b>19</b>  |
|            | analytical CV (%)               | 16          | 1.8         | 15         | 8          | 5.9         | 1.5         | 7.9        | 4.9         | 7.8        |
|            | %CV samples                     | 33          | 29          | 67         | 57         | 28          | 27          | 11         | 15          | 23         |
|            | % CV due inter-vine variability | 47          | 9           | 36         | 10         | 18          | 67          | 0          | 52          | -          |
| <b>ABA</b> | <b>median concentration</b>     | <b>1197</b> | <b>1380</b> | <b>32</b>  | <b>38</b>  | <b>298</b>  | <b>358</b>  | <b>93</b>  | <b>339</b>  | <b>33</b>  |
|            | analytical CV (%)               | 2           | 2.8         | 3.4        | 0.9        | 5.5         | 2.1         | 3.1        | 1.6         | 3.4        |
|            | %CV samples                     | 10          | 26          | 22         | 42         | 21          | 31          | 79         | 47          | 35         |
|            | % CV due inter-vine variability | 10          | 33          | 41         | 94         | 0           | 11          | 93         | 65          | 67         |
| <b>JA</b>  | <b>median concentration</b>     | <b>189</b>  | <b>140</b>  | <b>72</b>  | <b>5.2</b> | <b>282</b>  | <b>41</b>   | <b>16</b>  | <b>19</b>   | <b>8.2</b> |
|            | analytical CV (%)               | 1.3         | 17          | 10         | 3.7        | 7.4         | 10.7        | 6.1        | 2.8         | 6.6        |
|            | %CV samples                     | 84          | 92          | 56         | 46         | 50          | 85          | 43         | 75          | 57         |
|            | % CV due inter-vine variability | 1           | 0           | 28         | 0          | 54          | 93          | 11         | 0           | 31         |

\* Insufficient duplicate or triplicate samples to calculate analytical CV.

**Figure S1.** Principal Components Analysis of Psa, sampler and individual vine effects on metabolite profiles in internode, leaf and fruit tissues of ‘Hayward’ kiwifruit collected at three harvest times. Data are for metabolites with CV <20% in the experimental data.

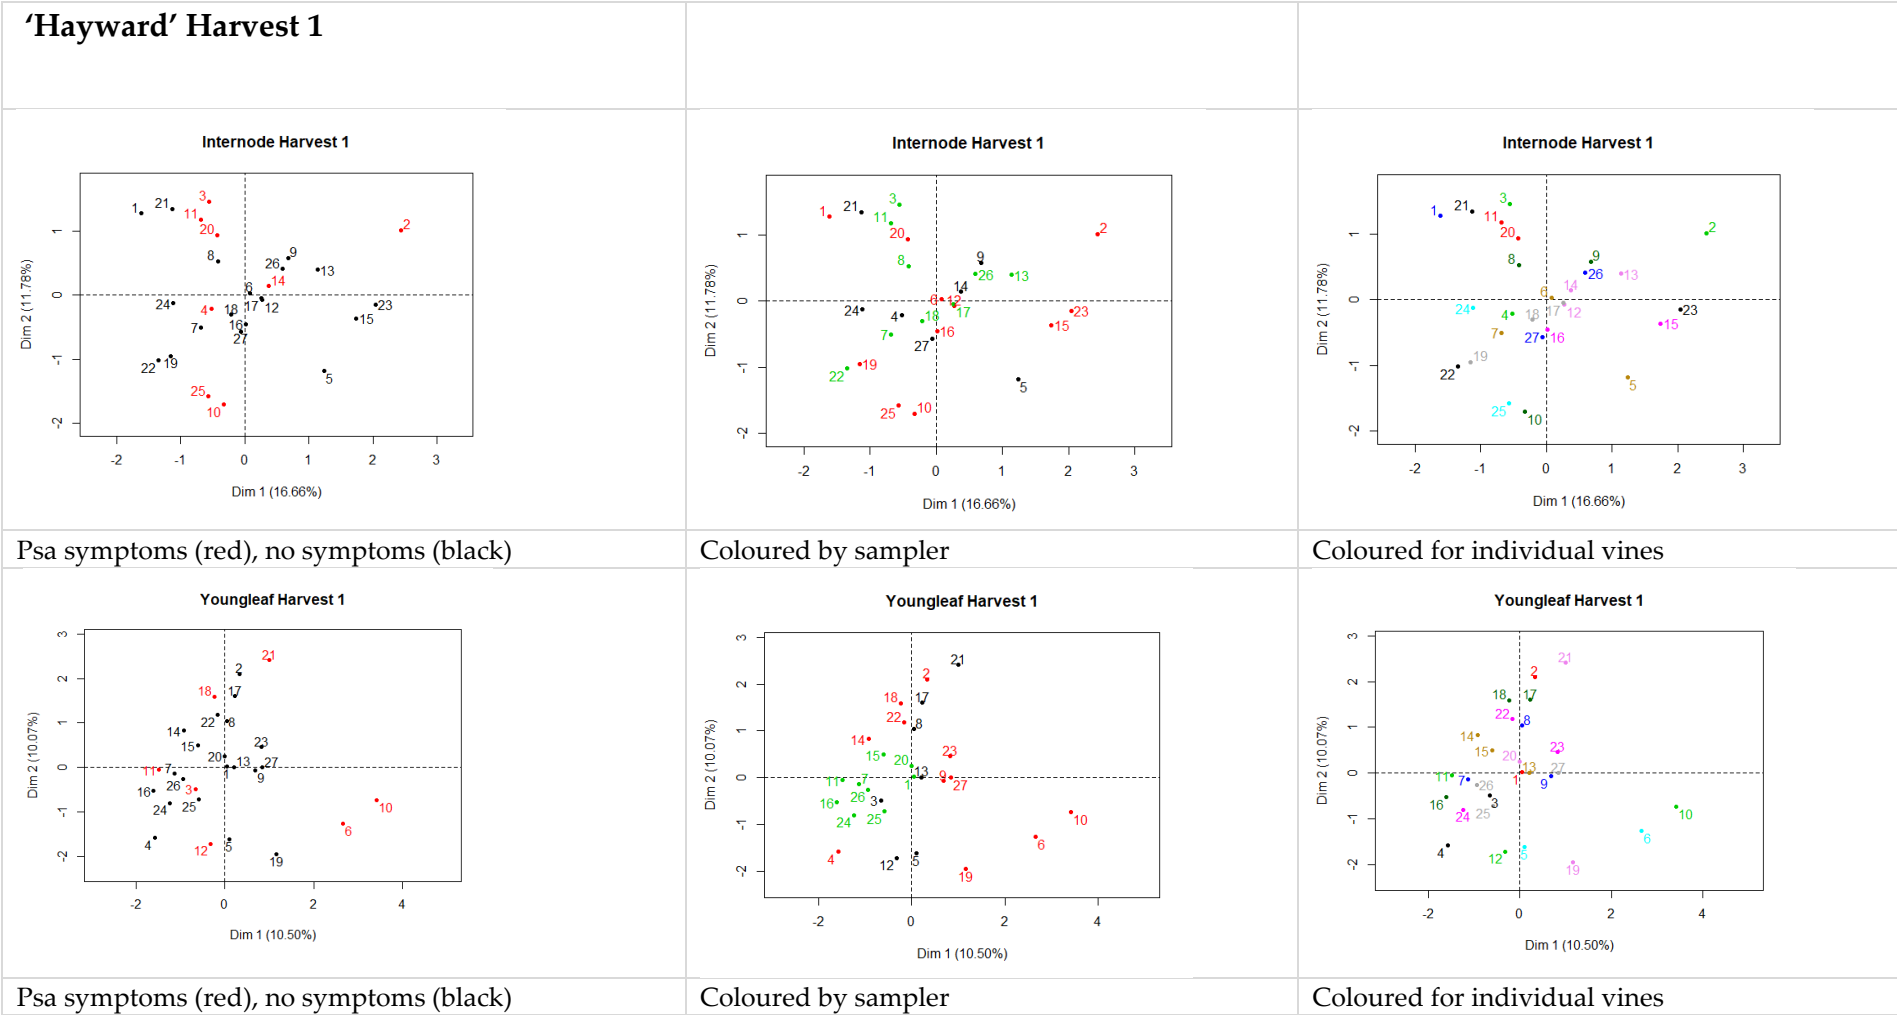

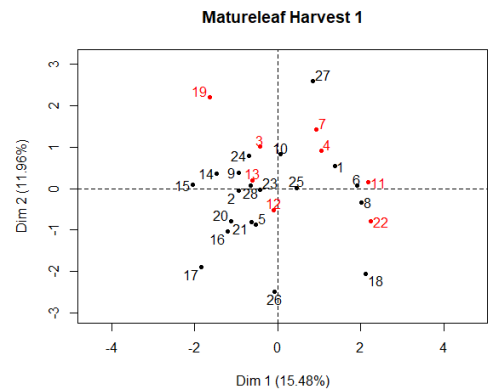

Psa symptoms (red), no symptoms (black)

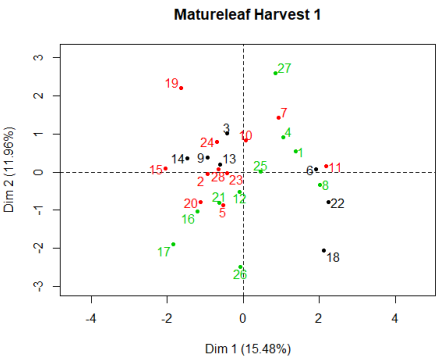

Coloured by sampler

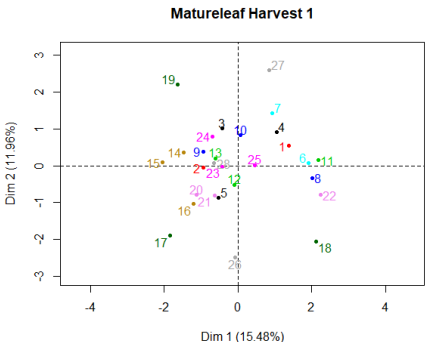

Coloured for individual vines

## 'Hayward' Harvest 2

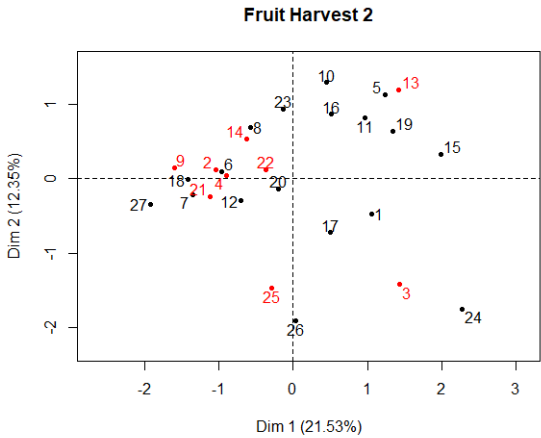

Psa symptoms (red), no symptoms (black)

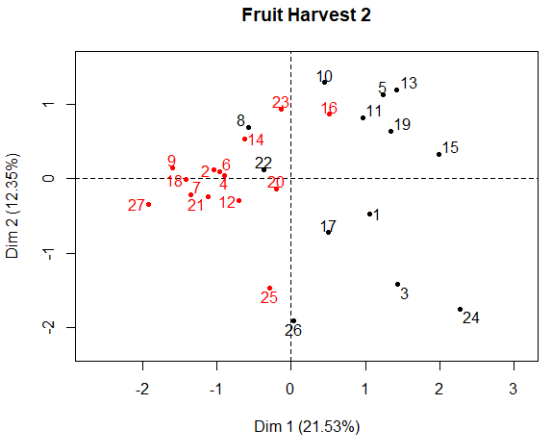

Coloured by sampler

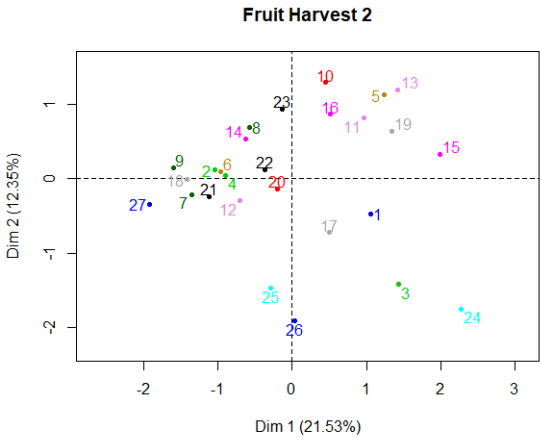

Coloured for individual vines



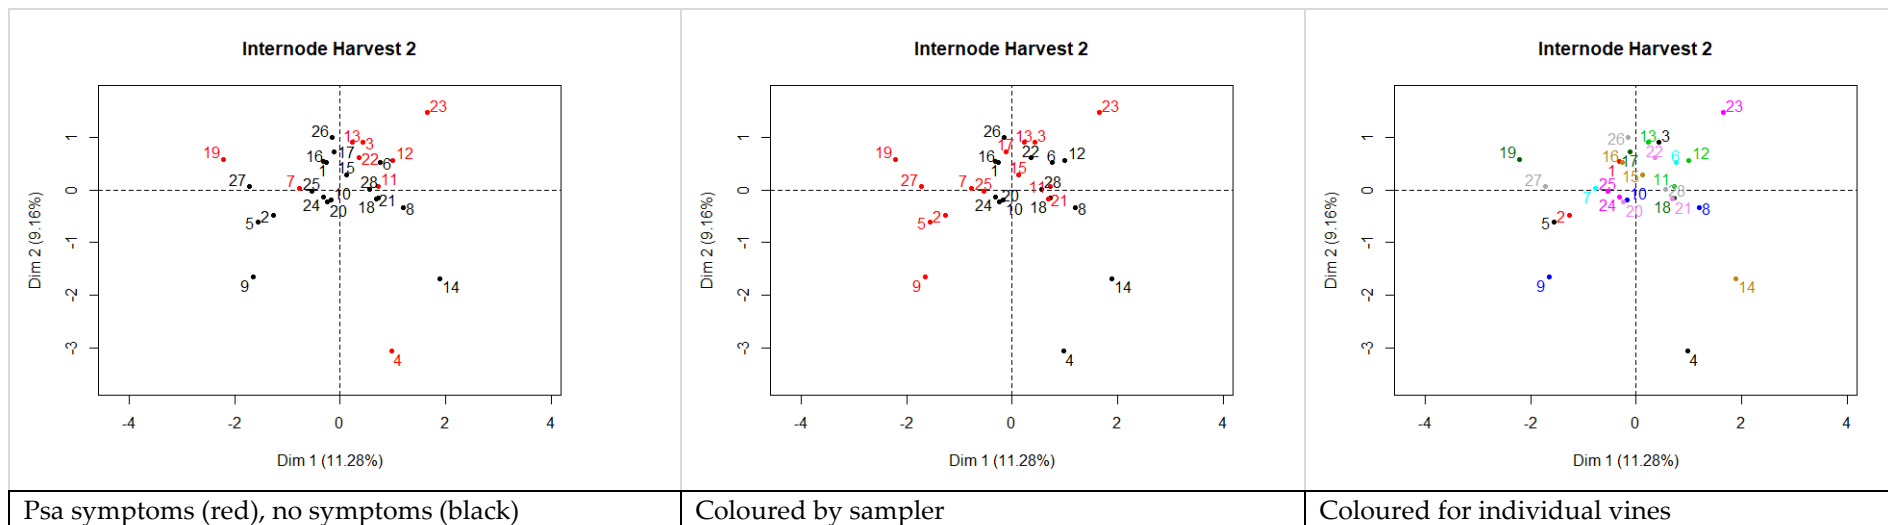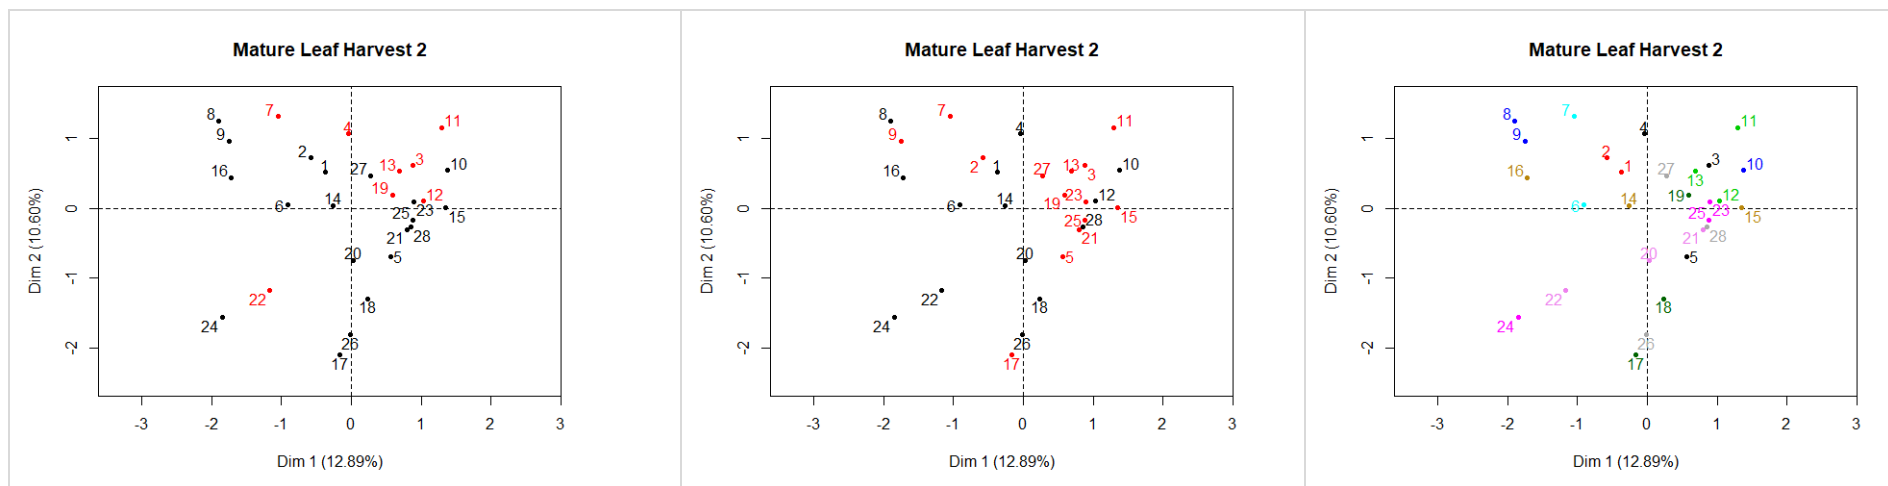

|                                         |                     |                               |
|-----------------------------------------|---------------------|-------------------------------|
| Psa symptoms (red), no symptoms (black) | Coloured by sampler | Coloured for individual vines |
|-----------------------------------------|---------------------|-------------------------------|

'Hayward' Harvest 3

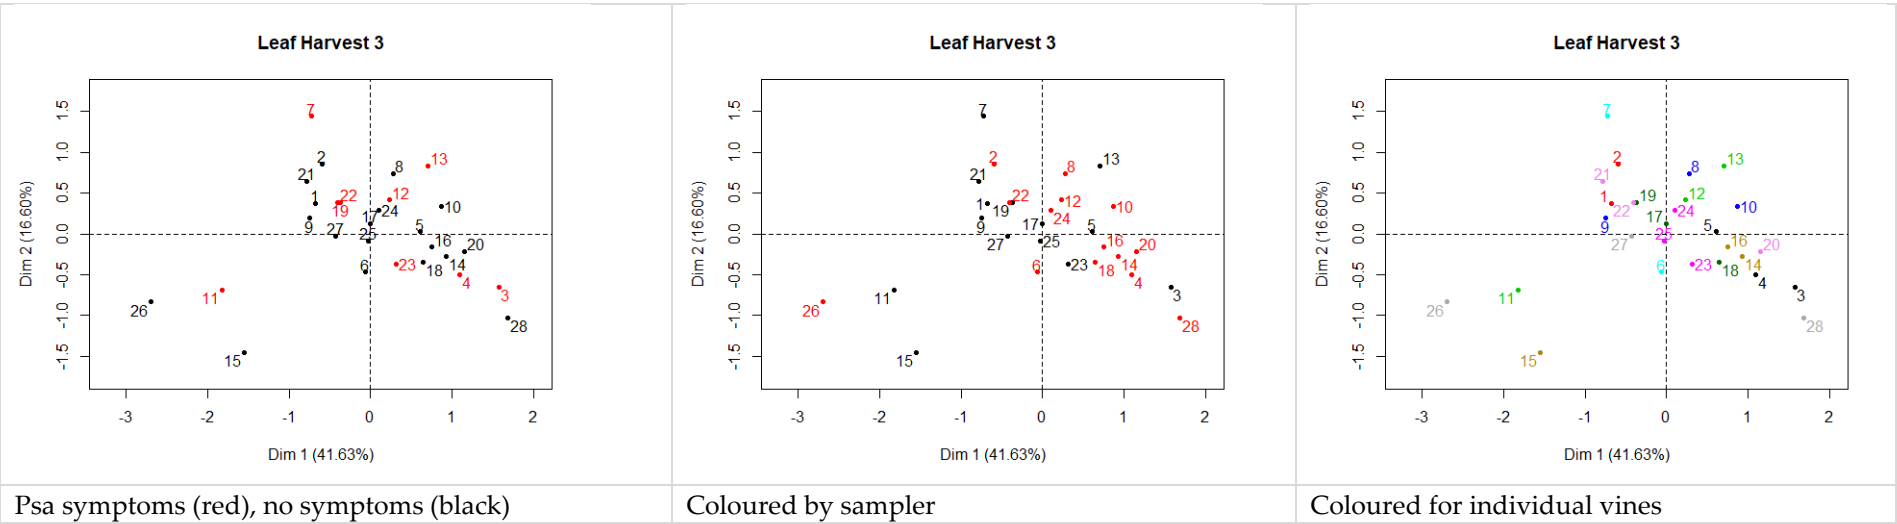

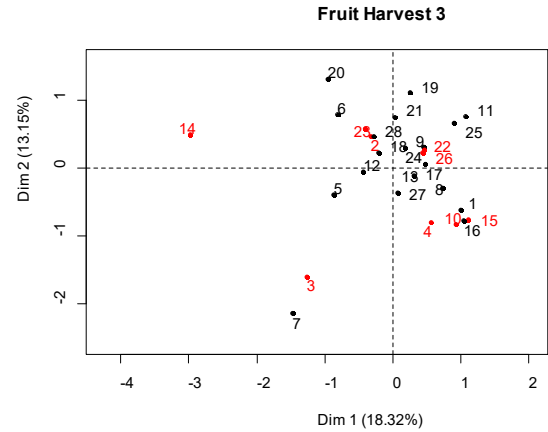

Psa symptoms (red), no symptoms (black)

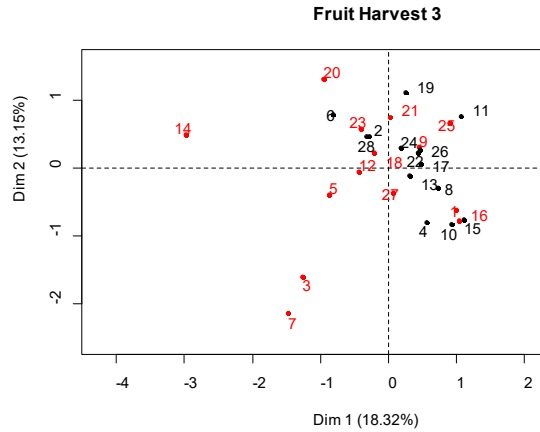

Coloured by sampler

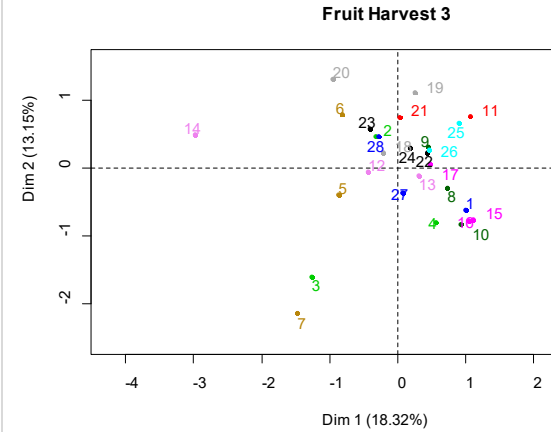

Coloured for individual vines

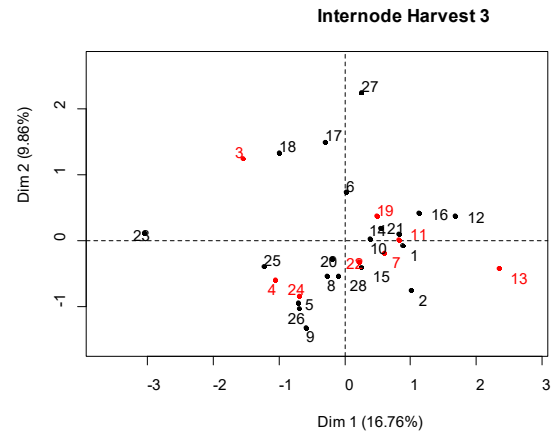

Psa symptoms (red), no symptoms (black)

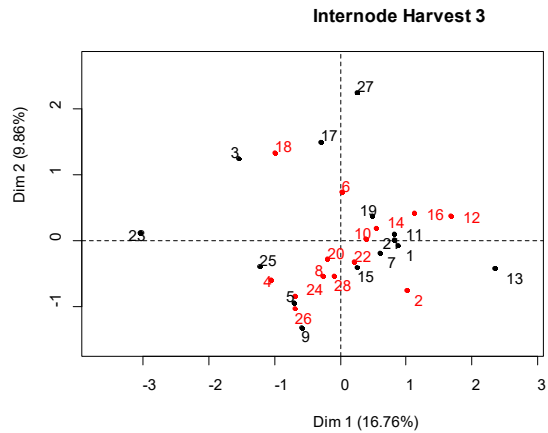

Coloured by sampler

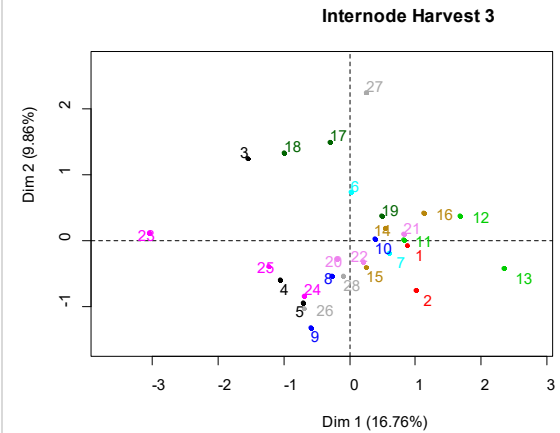

Coloured for individual vines

**Figure S2.** Principal Components Analysis of Psa, sampler and individual vine effects on metabolite profiles in internode, leaf and fruit tissues of Zesy002 kiwifruit collected at three harvest times. Data are for metabolites with CV <20% in the experimental data.

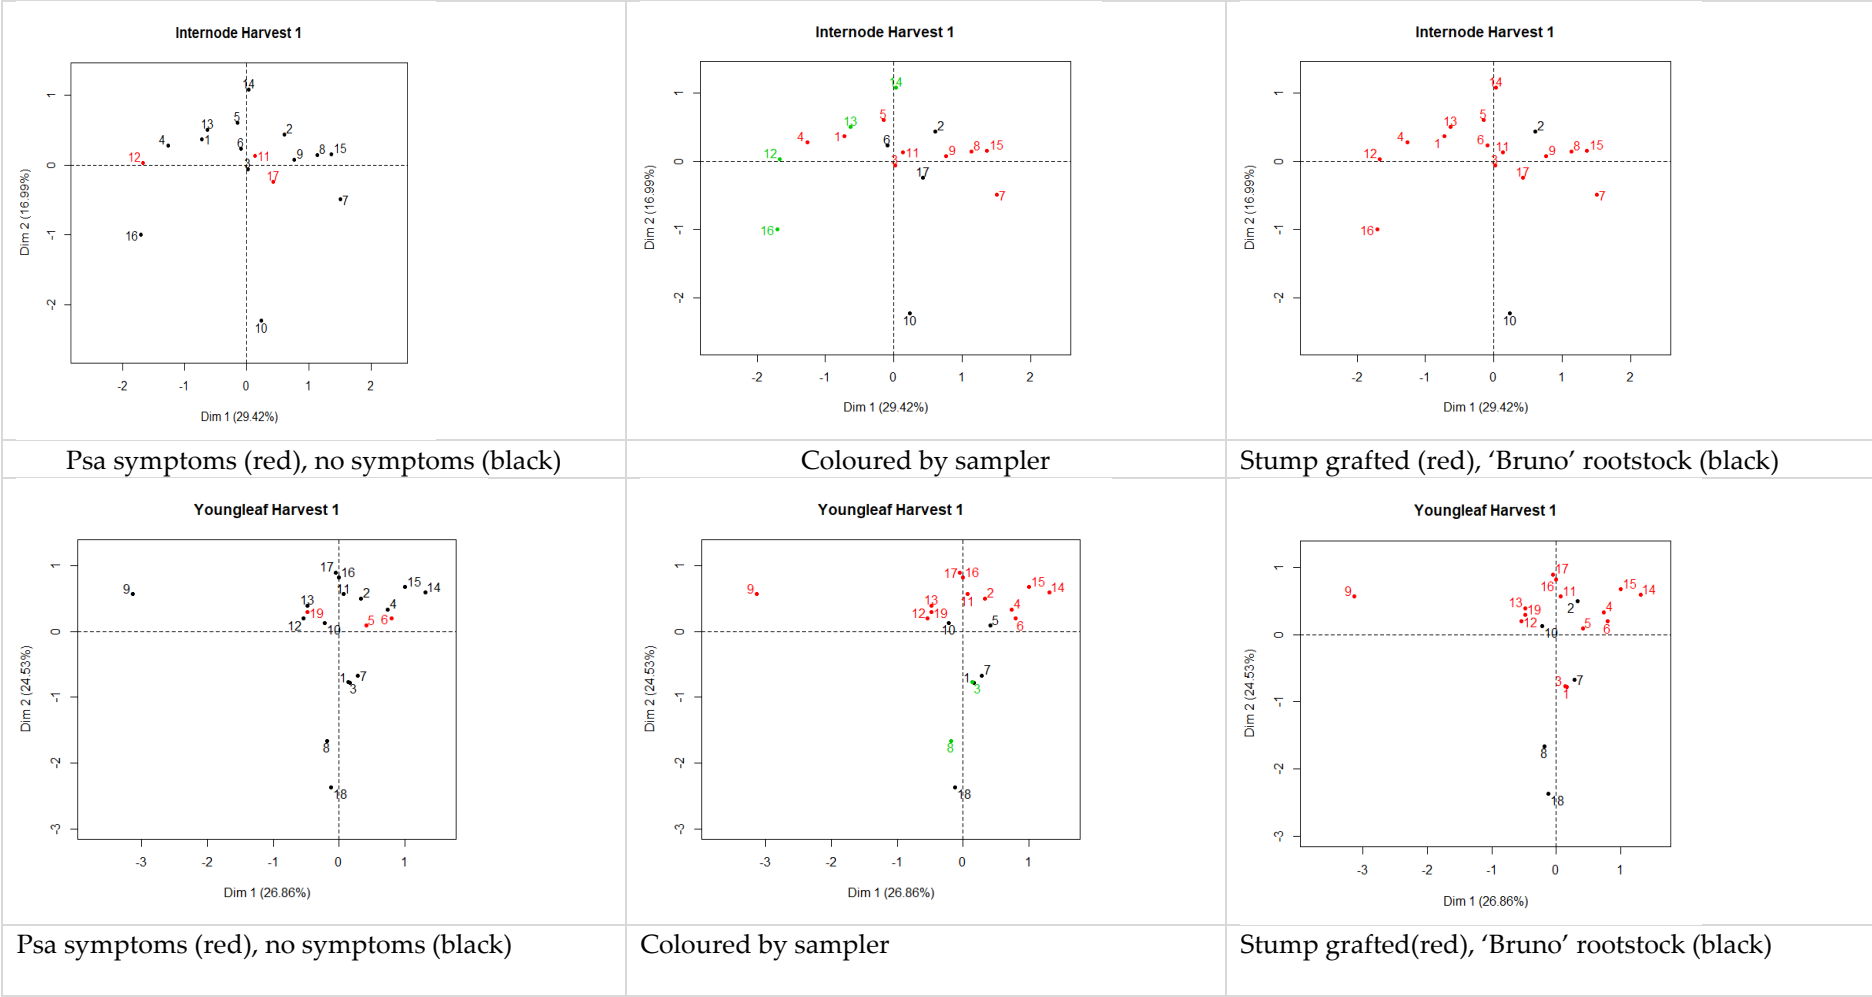

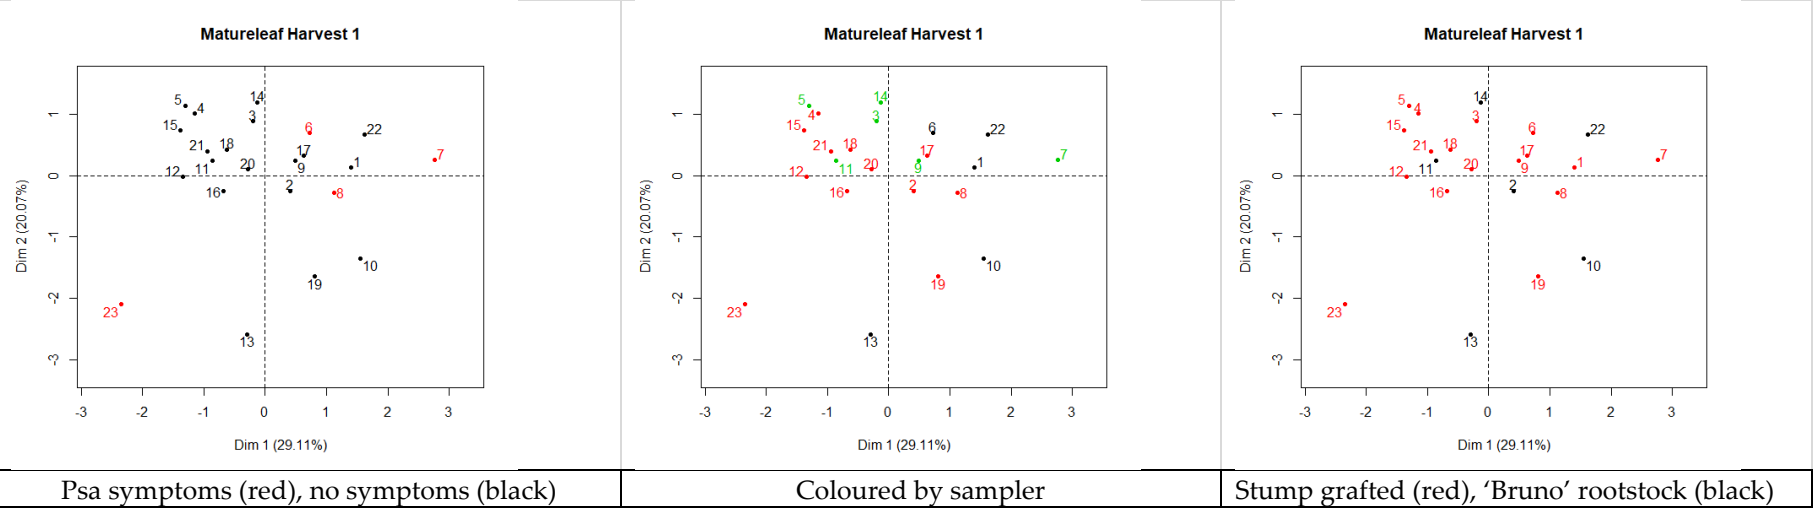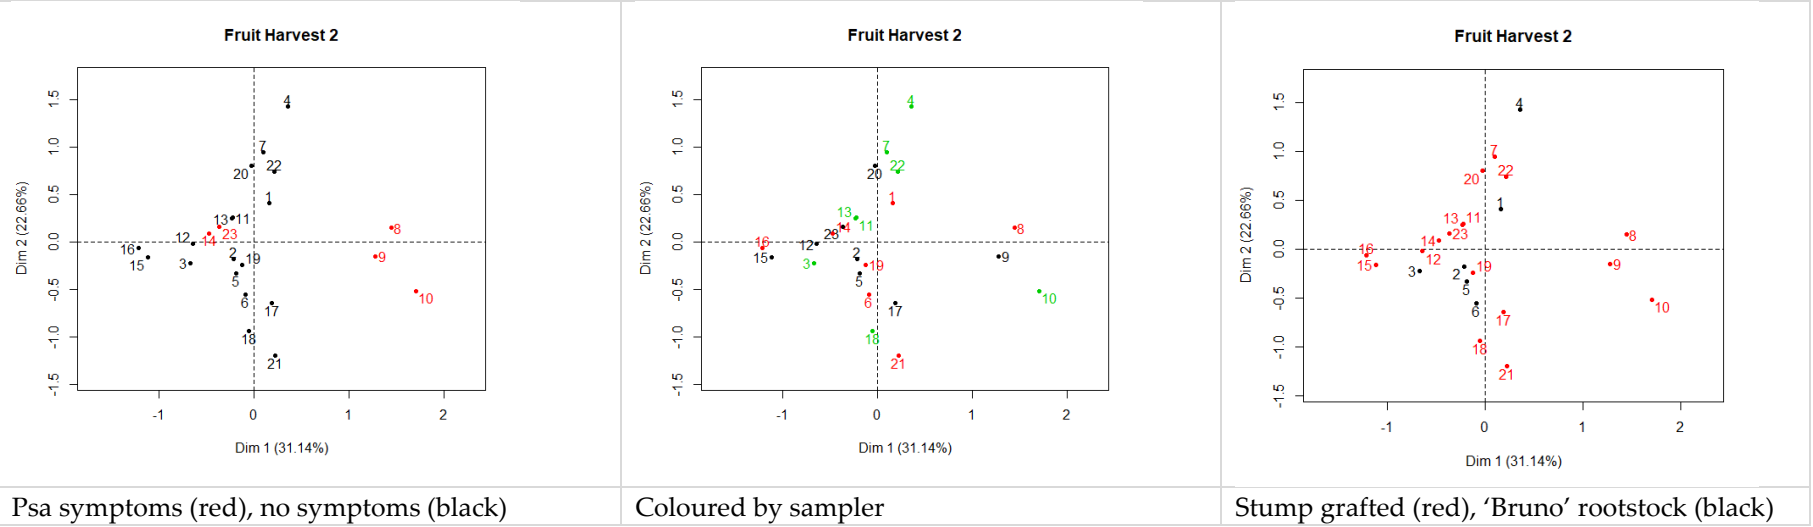

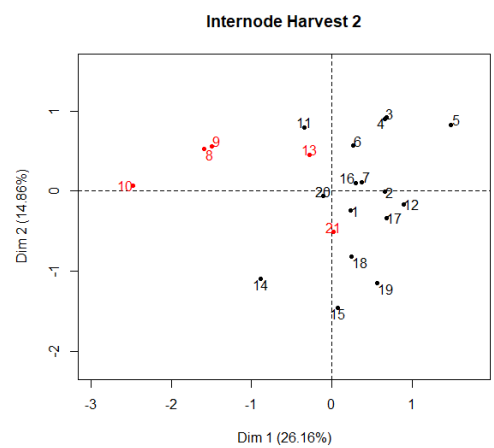

Psa symptoms (red), no symptoms (black)

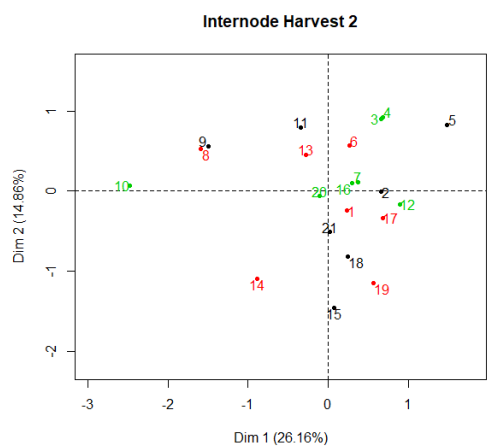

Coloured by sampler

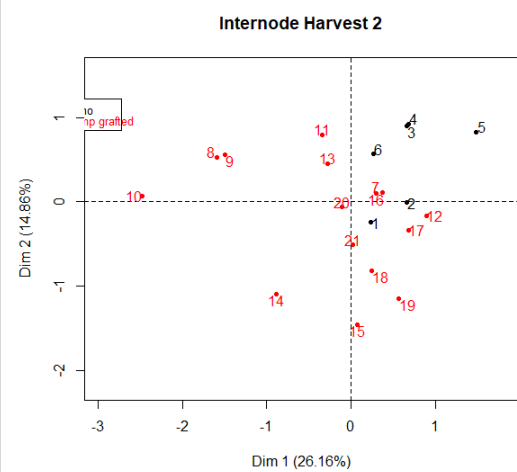

Stump grafted (red), 'Bruno' rootstock (black)

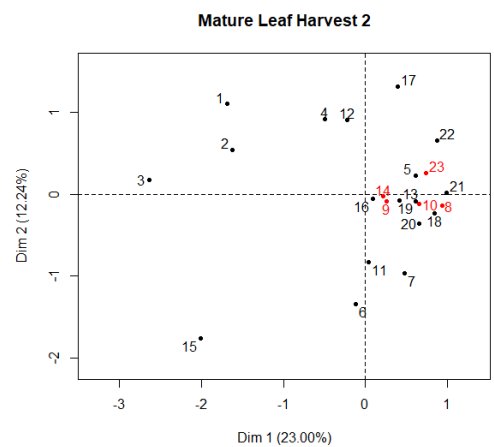

Psa symptoms (red), no symptoms (black)

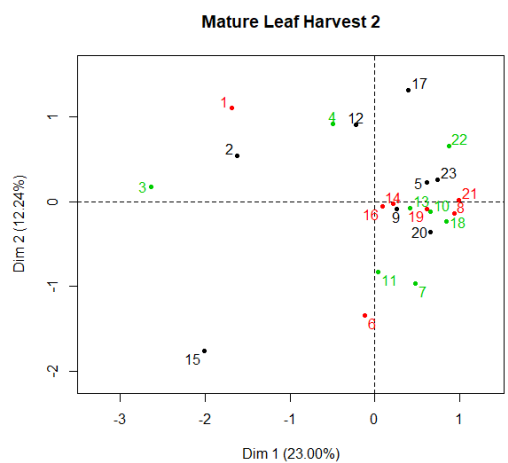

Coloured by sampler

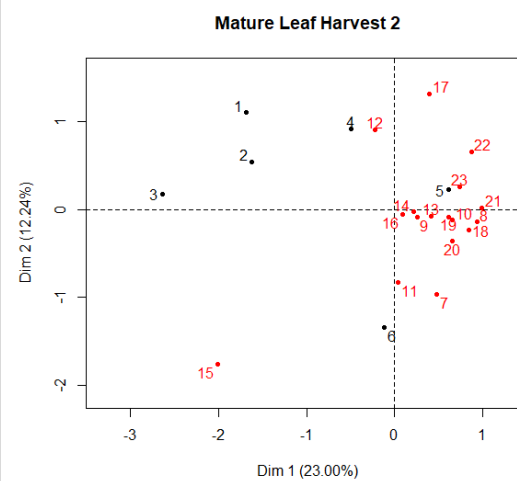

Stump grafted (red), 'Bruno' rootstock (black)

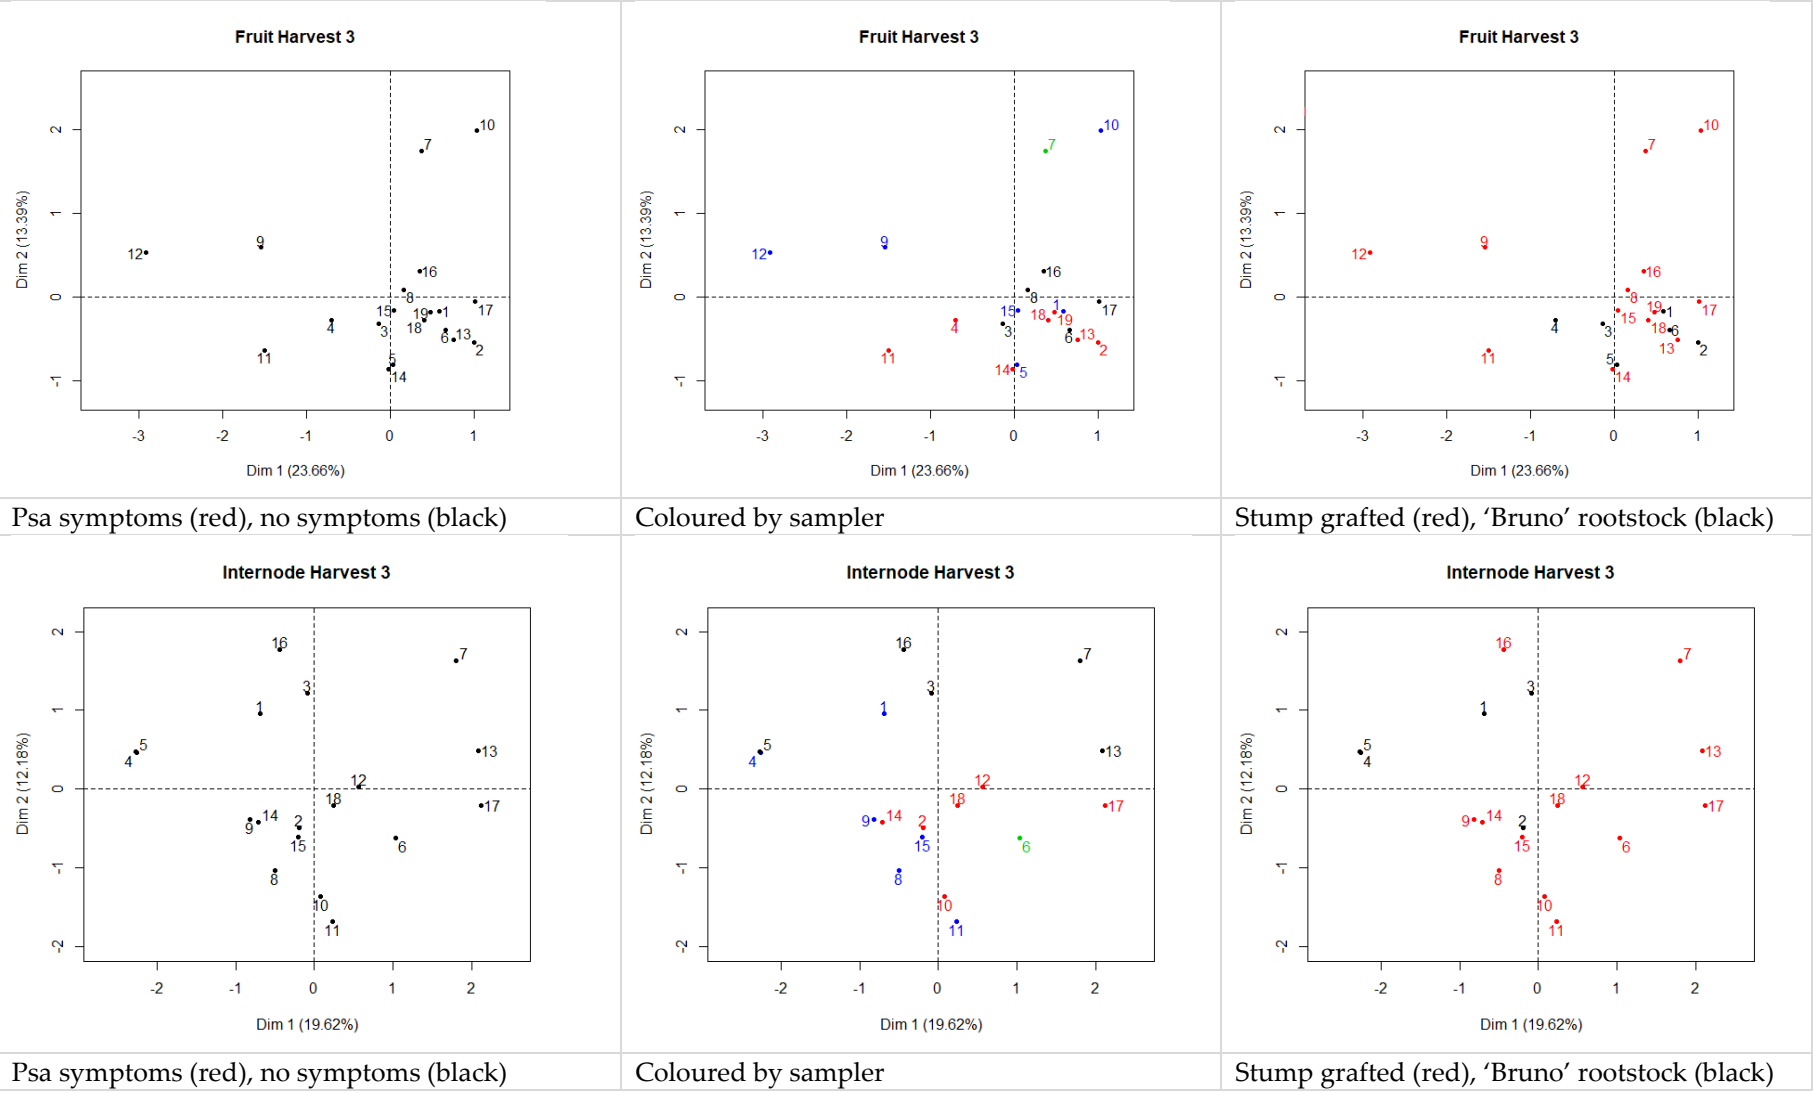

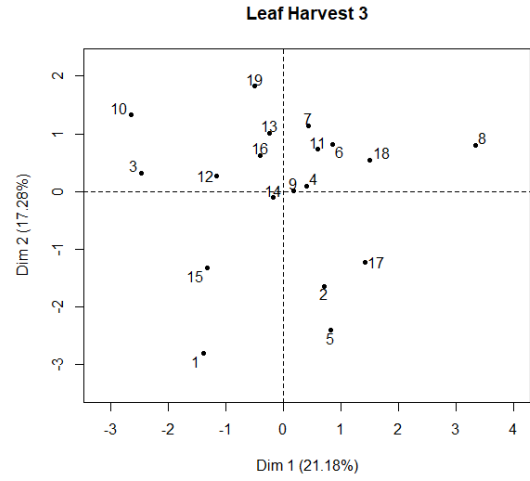

Psa symptoms (red), no symptoms (black)

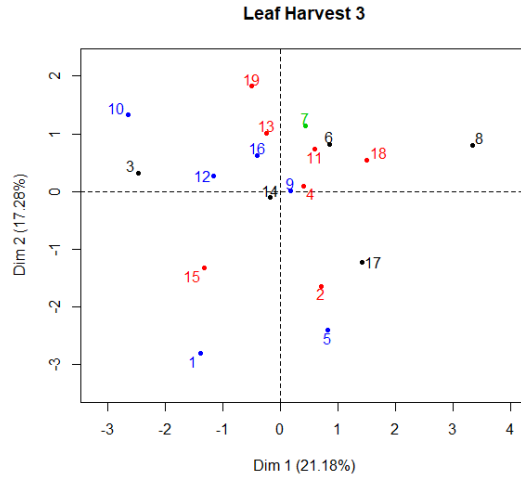

Coloured by sampler

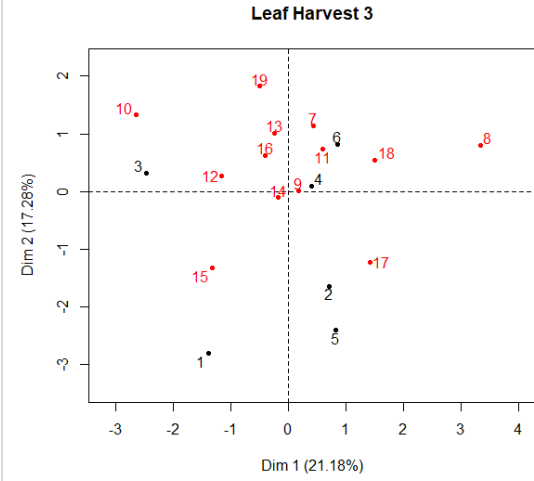

Stump grafted (red), 'Bruno' rootstock (black)
